# Supplementary material
Source: PubMed Central journal article supplement (PMC1851816)
Supplement: plntphys_pp.106.090902_1.pdf [file plntphys_pp.106.090902_1.pdf]

## SUPPLEMENTAL FIGURE LEGENDS

**Figure S1.** Generation of H<sub>2</sub>O<sub>2</sub> in cryptogein or W7 treated BY-2 cells as reported by Amplex Ultra Red assay. Left panel, representative kinetics graph of H<sub>2</sub>O<sub>2</sub> response as measured by fluorescence emission. Arrow indicates the time addition point. Right panel, accumulation of H<sub>2</sub>O<sub>2</sub> with Amplex Ultra Red right after the addition (arrow) of the 100 nM cryptogein or 600 μM W7 (n = 3, Av ± SD).

**Figure S2.** Imaging of H<sub>2</sub>O<sub>2</sub> accumulation in BY-2 cells stained with DCF and Amplex Red.

Optical confocal sections images of BY-2 cells. The cells were double-stained with DCF and Amplex Red and images were obtained 4 min after H<sub>2</sub>O<sub>2</sub> addition. The images are color-coded as follows: green for DCF (left panel); red for Amplex Red (AR; middle panel); yellow for merged image (right panel). Scale bar in lower left panel = 10 μm.

**Figure S3.** Examination of the fluorescent properties of Amplex Red and Amplex Ultra Red reagents in the presence of DPI and catalase.

Measurements of AR and AUR fluorescence emission were carried out in a cell-free assay. The production of the fluorescent resorufin was initiated by the addition of H<sub>2</sub>O<sub>2</sub> (0.1 mM). Catalase (628 U/ml) was added as indicated. The experiments were conducted in the presence or the absence of DPI (2 μM).

A. Representative kinetics graph of Amplex Ultra Red fluorescence.

B. Representative kinetics graph of Amplex Red fluorescence.
